# Supplementary material for: Inhibited phase behavior of gas hydrates in graphene oxide: influences of surface and geometric constraints
Source: Royal Society of Chemistry journal article supplement (doi:10.1039/c4cp03263b), 2014-01-01
Supplement: c4cp03263b1.pdf [file c4cp03263b1.pdf]

## Inhibited Phase Behavior of Gas Hydrate in Graphene Oxide: Influences of Surface and Geometric Constraint

Daek Kim,<sup>a,†</sup> Dae Woo Kim,<sup>b,‡</sup> Hyung-Kyu Lim,<sup>a</sup> Jiwon Jeon,<sup>a</sup> Hyungjun Kim,<sup>a</sup> Hee-Tae Jung,<sup>b,★</sup>  
and Huen Lee<sup>ab,★</sup>

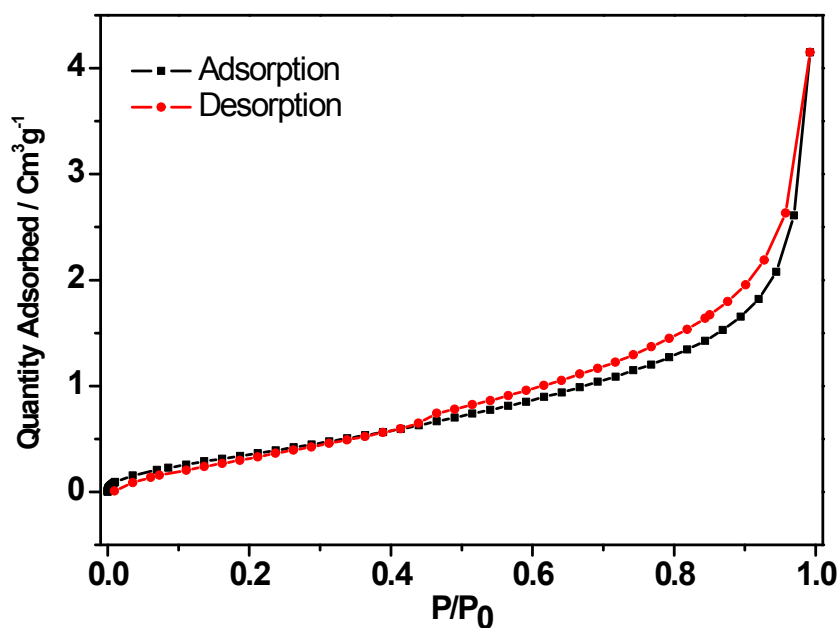

Figure S1. Ar isotherm of graphene oxide, which was used for pore analysis

### Pore properties of graphene oxide.

#### Surface Area

Single point surface area at  $P/P_0 = 0.186973802$ : 1.0481 m<sup>2</sup>/g

BET Surface Area: 1.3457 m<sup>2</sup>/g

Langmuir Surface Area: 2.1803 m<sup>2</sup>/g

t-Plot External Surface Area: 1.5149 m<sup>2</sup>/g

BJH Adsorption cumulative surface area of pores

between 17.000 Å and 3000.000 Å diameter: 1.553 m<sup>2</sup>/g

BJH Desorption cumulative surface area of pores

between 17.000 Å and 3000.000 Å diameter: 1.8026 m<sup>2</sup>/g

#### Pore Volume

Single point adsorption total pore volume of pores

less than 2607.475 Å diameter at  $P/P_0 = 0.991904825$ : 0.005311 cm<sup>3</sup>/g

t-Plot micropore volume: 0.000068 cm<sup>3</sup>/g

BJH Adsorption cumulative volume of pores

between 17.000 Å and 3000.000 Å diameter: 0.005206 cm<sup>3</sup>/g

BJH Desorption cumulative volume of pores

between 17.000 Å and 3000.000 Å diameter: 0.005212 cm<sup>3</sup>/g

#### Pore Size

Adsorption average pore width (4V/A by BET): 157.8671 Å

BJH Adsorption average pore diameter (4V/A): 134.074 Å

BJH Desorption average pore diameter (4V/A): 115.651 Å
